# Supplementary material for: Regulation of the Gene for Alanine Racemase Modulates Amino Acid Metabolism with Consequent Alterations in Cell Wall Properties and Adhesive Capability in Brucella spp.
Source: MDPI journal article supplement (doi:10.3390/ijms242216145), 2023-11-09
Supplement: s1 [file s1]

**Table S1.** Amino-acid composition of the ALR proteins.

| Amino acid name | Number of each amino acid | The proportion of the total amino acids |
|-----------------|---------------------------|-----------------------------------------|
| Ala (A)         | 53                        | 13.3%                                   |
| Arg (R)         | 25                        | 6.3%                                    |
| Asn (N)         | 14                        | 3.5%                                    |
| Asp (D)         | 23                        | 5.8%                                    |
| Cys (C)         | 3                         | 0.8%                                    |
| Gln (Q)         | 8                         | 2.0%                                    |
| Glu (E)         | 17                        | 4.3%                                    |
| Gly (G)         | 36                        | 9.0%                                    |
| His (H)         | 7                         | 1.8%                                    |
| Ile (I)         | 20                        | 5.0%                                    |
| Leu (L)         | 51                        | 12.8%                                   |
| Lys (K)         | 17                        | 4.3%                                    |
| Met (M)         | 6                         | 1.5%                                    |
| Phe (F)         | 14                        | 3.5%                                    |
| Pro (P)         | 20                        | 5.0%                                    |
| Ser (S)         | 20                        | 5.0%                                    |
| Thr (T)         | 25                        | 6.3%                                    |
| Trp (W)         | 1                         | 0.3%                                    |
| Tyr (Y)         | 14                        | 3.5%                                    |
| Val (V)         | 25                        | 6.3%                                    |

**Table S2.** Chemically defined medium, CDM

| Composition                    | Content( $\mu\text{g/ml}$ ) |
|--------------------------------|-----------------------------|
| L-Tryptophan (L-Trp)           | 25                          |
| L-Tyrosine (L-Tyr)             | 25                          |
| L-Phenylalanine (L-Phe)        | 25                          |
| L-Cysteine (L-Cys)             | 5                           |
| L-Histidine (L-His)            | 100                         |
| L-Methionine (L-Met)           | 50                          |
| L-Glutamic acid (L-Glu)        | 3000                        |
| Glycine (Gly)                  | 100                         |
| L-Proline (L-Pro)              | 100                         |
| L-Threonine (L-Thr)            | 25                          |
| L-Valine (L-Val)               | 100                         |
| L-Leucine (L-Leu)              | 50                          |
| L-Isoleucine (L-Ile)           | 50                          |
| DL-Alanine (DL-Ala)            | 100                         |
| L-Arginine (L-Arg)             | 100                         |
| L-Lysine (L-Lys)               | 100                         |
| L-Aspartic acid (L-Asp)        | 200                         |
| L-Serine (L-Ser)               | 25                          |
| Glucose                        | 4000                        |
| Magnesium sulfate              | 100                         |
| Sodium thiosulfate             | 100                         |
| NaCl                           | 7500                        |
| Dipotassium hydrogen phosphate | 1000                        |
| Thiamin                        | 0.2                         |
| Nicotinic acid                 | 0.2                         |
| Pantothenate                   | 0.04                        |
| Biotin                         | 0.001                       |
| Fe <sup>++</sup>               | 0.1                         |
| Mn <sup>++</sup>               | 0.1                         |

Use NaOH to adjust pH to 6.8-7.0, add water to 1L, use 0.22 $\mu\text{M}$  filter to remove bacteria, and store at 4°C.

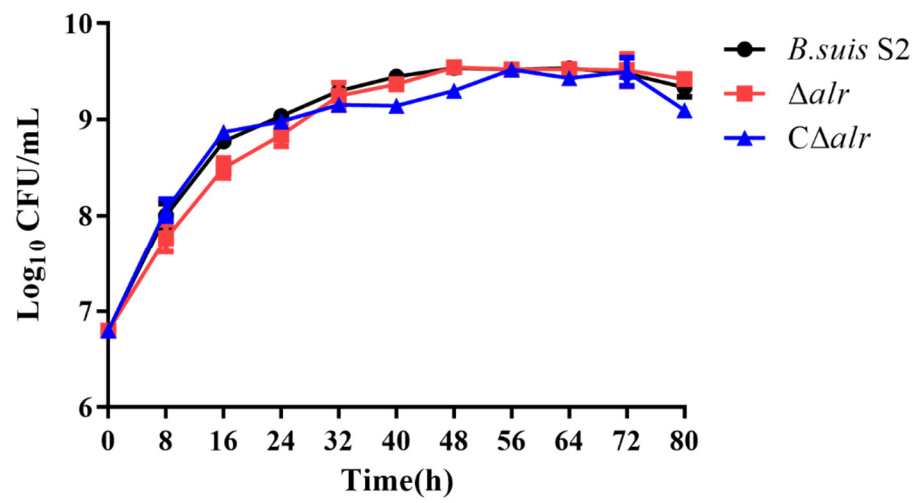

**Figure S1.** Growth curves of three *Brucella* strains. The Y-axis represents Colony-Forming Units (CFU), and the X-axis represents the incubation time.
